# Supplementary figures and images for: AICAR Antiproliferative Properties Involve the AMPK-Independent Activation of the Tumor Suppressors LATS 1 and 2
Source: PubMed Central journal article supplement — Neoplasia. 2018 May 3;20(6):555–62. doi: 10.1016/j.neo.2018.03.006 (PMC5994775; doi:10.1016/j.neo.2018.03.006), 2018-05-03

**A**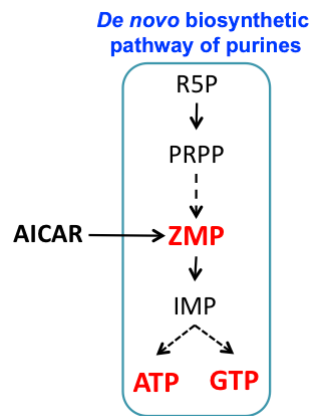**B**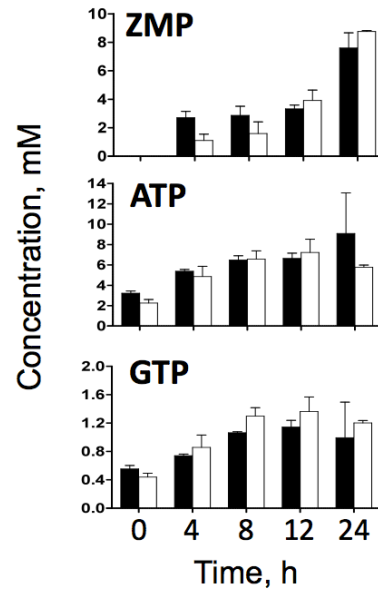

Figure S1  
Philippe et al. 2018

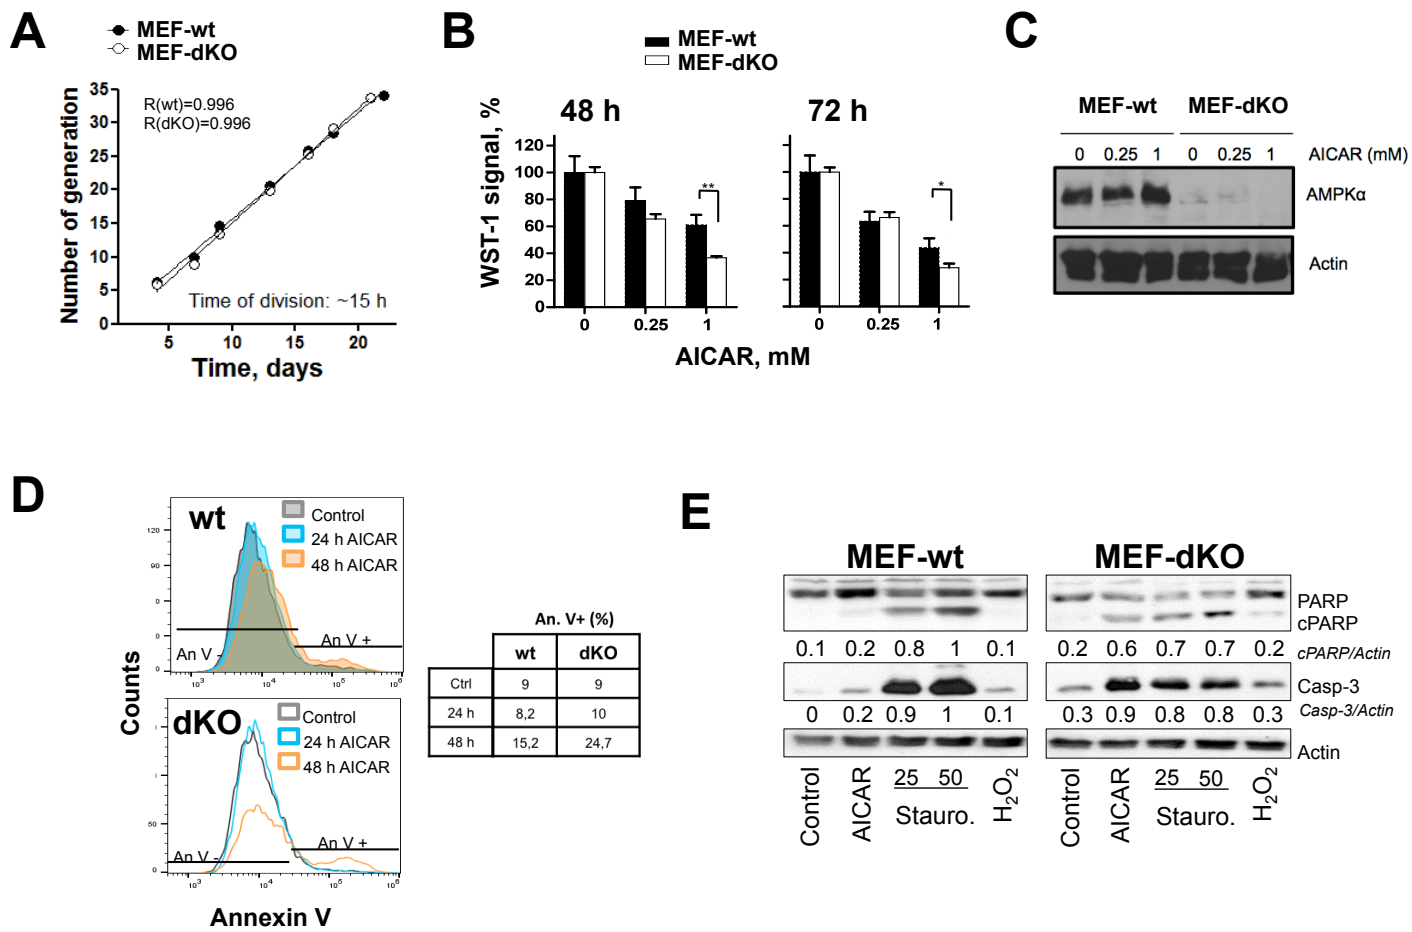

Figure S2  
Philippe et al. 2018

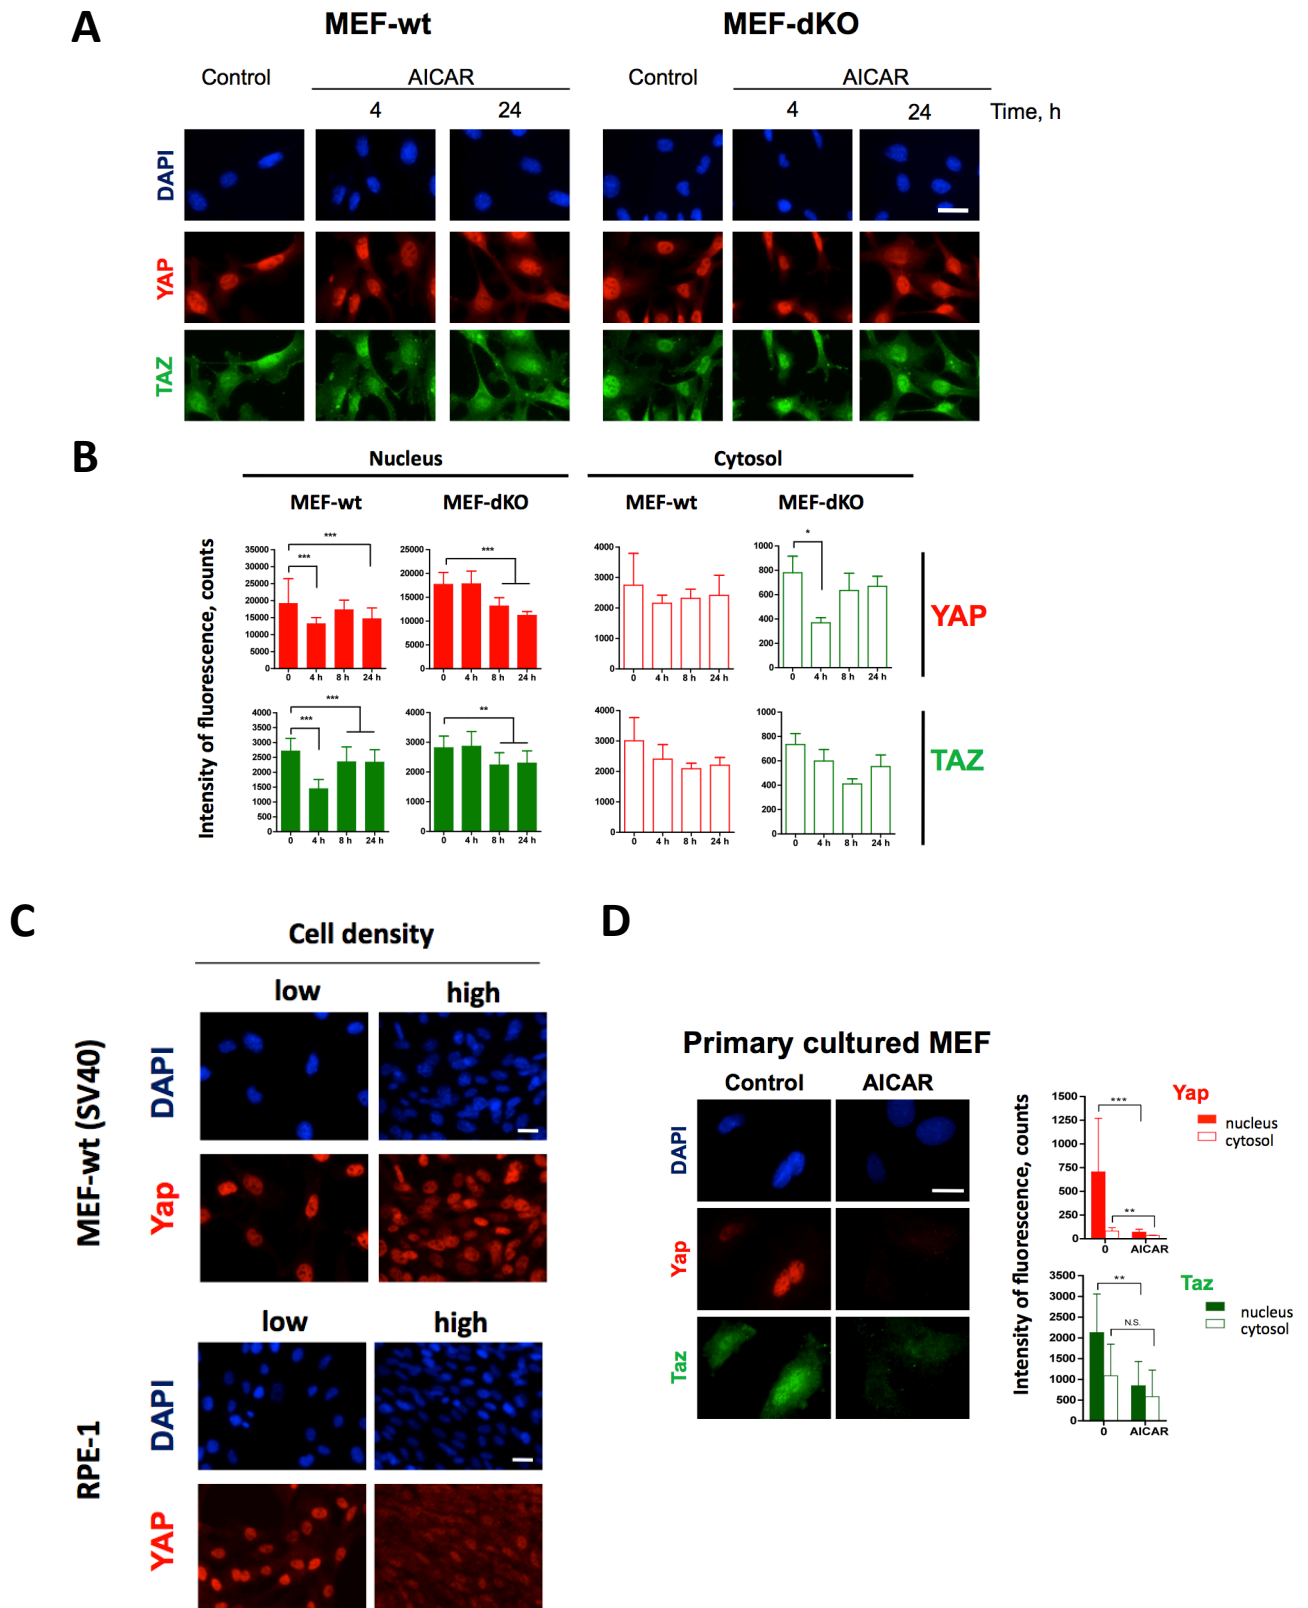

Figure S3  
Philippe et al. 2018

Supplement: mmc5.pdf [file mmc5.pdf]
